# Supplementary material for: In situ growth of binder-free CNTs@Ni–Co–S nanosheets core/shell hybrids on Ni mesh for high energy density asymmetric supercapacitors
Source: Royal Society of Chemistry journal article supplement (doi:10.1039/c6ta02410f), 2016-01-01
Supplement: c6ta02410f1.pdf [file c6ta02410f1.pdf]

# In-situ Growth of Binder-free CNTs@Ni-Co-S Nanosheet Core/Shell Hybrids on Ni Mesh for High Energy Density Asymmetric Supercapacitors

Tianquan Peng, Huan Yi, Peng Sun, Yuting Jing, Ruijing Wang, Huanwen Wang and  
Xuefeng Wang\*

Shanghai Key Lab of Chemical Assessment and Sustainability, Department of  
Chemistry, Tongji University, Shanghai 200092, China

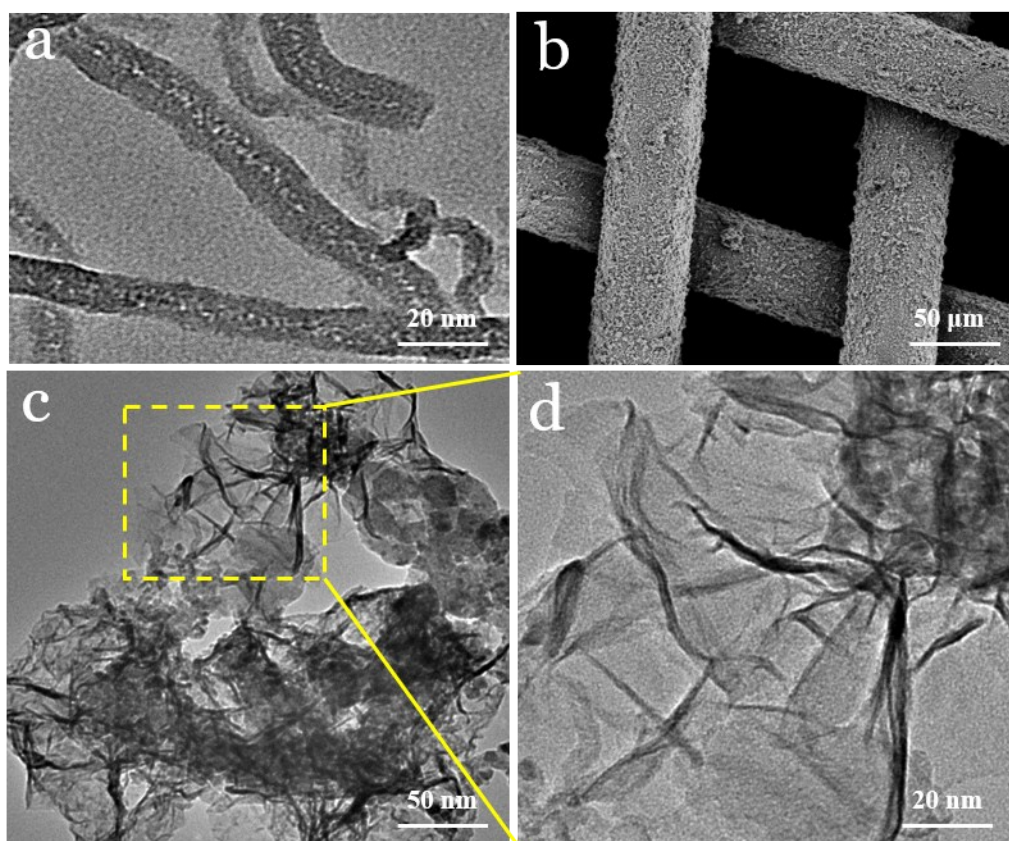

**Fig. S1.** (a) TEM image of the CNTs grown on Ni mesh. (b) FESEM overview images for the CNTs@Ni-Co-S composites on Ni mesh. (c-d) TEM images for Ni-Co-S nanosheets.

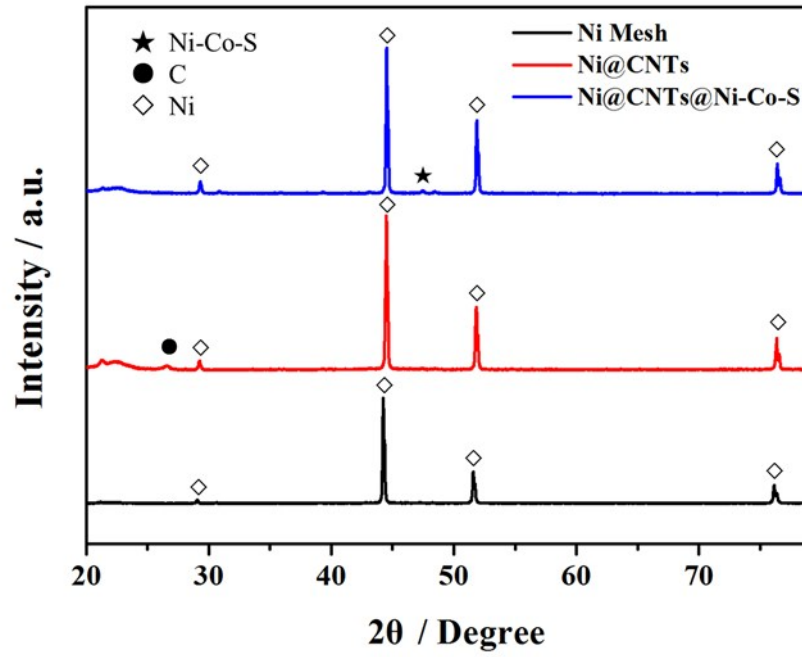

**Fig. S2.** The XRD patterns for Ni mesh, Ni@CNTs and Ni@CNTs@Ni-Co-S.

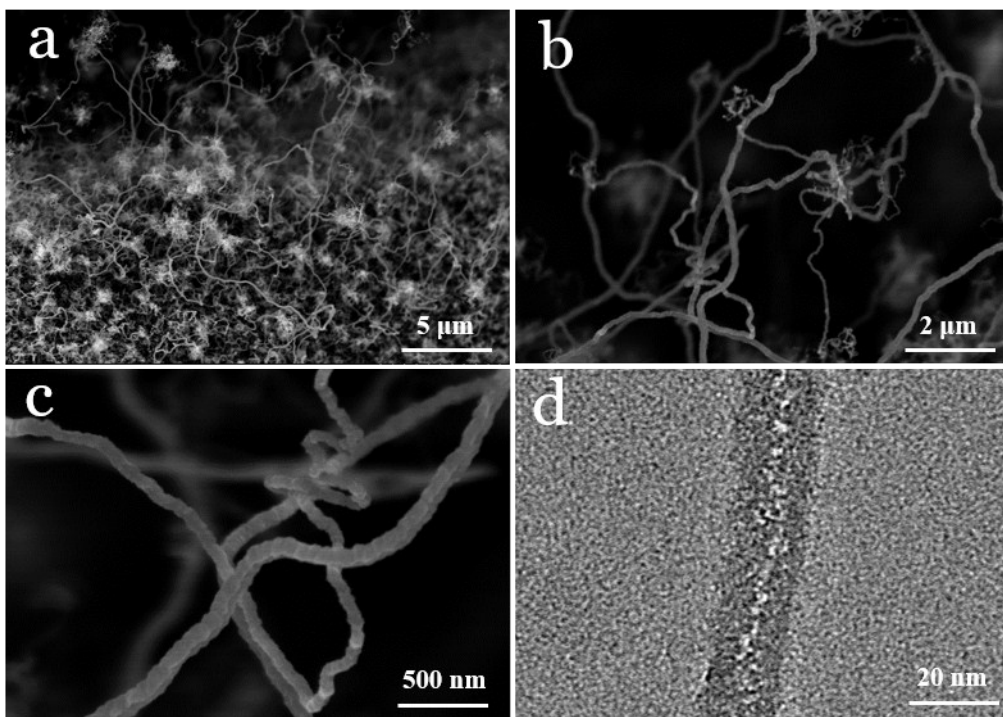

**Fig. S3.** (a-c) SEM images of the CNTs grown on carbon cloth. (b) TEM image for the CNTs on carbon cloth.

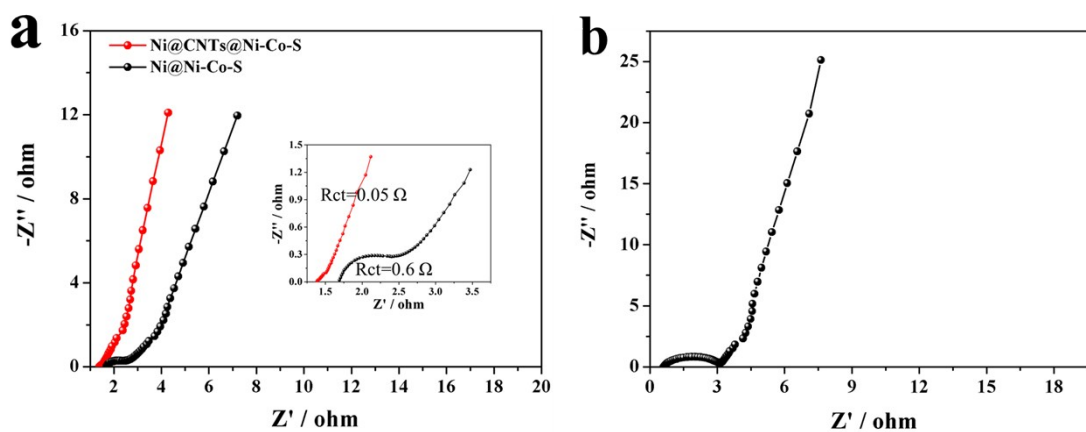

**Fig. S4.** Nyquist plots of (a) Ni@CNTs@Ni-Co-S and Ni@Ni-Co-S (inset: EIS spectrum in high frequency), (b) Ni@CNTs@Ni-Co-S//CC@CNTs asymmetric supercapacitors.

The Nyquist plots of Ni@CNTs@Ni-Co-S and Ni@Ni-Co-S are illustrated in Fig. S4. As shown in Fig. S4a, the axis intercepts in the high frequency range of the Ni@CNTs@Ni-Co-S is much smaller than the Ni@Ni-Co-S, indicating

Ni@CNTs@Ni-Co-S has a much smaller internal resistance ( $R_s$ ). In addition, it is obvious that the semicircle of the Ni@CNTs@Ni-Co-S is much smaller than the Ni@Ni-Co-S, indicating Ni@CNTs@Ni-Co-S has a much lower interfacial charge-transfer resistance ( $R_{ct}$ ). Furthermore, Ni@CNTs@Ni-Co-S exhibits a slightly more vertical line in the low frequency range, suggesting that Ni@CNTs@Ni-Co-S has a lower Warburg resistance (described as diffusive impedance of ions) than Ni@Ni-Co-S. All the evidence show that the “core/shell” design of CNTs@Ni-Co-S composites realize a lower resistance than Ni-Co-S.

Fig. S4b illustrates the impedance data of Ni@CNTs@Ni-Co-S//CC@CNTs asymmetric supercapacitors. It can be found that the device has a low  $R_s$  ( $\approx 0.6 \Omega$ ), relatively high  $R_{ct}$  and low Warburg resistance.

Table S1. Electrochemical properties for nickel cobalt sulfide-based supercapacitors reported in recent years.

| Ni-Co-S based electrode                                                          | Potential range              | Specific capacitance                                  | Rate capability                                               | Ref.      |
|----------------------------------------------------------------------------------|------------------------------|-------------------------------------------------------|---------------------------------------------------------------|-----------|
| CNTs@Ni-Co-S nanosheet core/shell arrays                                         | -0.2 V ~ 0.6 V<br>(vs. SCE)  | 222 mAh g <sup>-1</sup><br>at 4 A g <sup>-1</sup>     | 193 mAh g <sup>-1</sup> (87.1%)<br>at 50 A g <sup>-1</sup>    | this work |
| urchin-like NiCo <sub>2</sub> S <sub>4</sub>                                     | 0V~0.565V<br>(vs. Hg/HgO)    | 180 mAh g <sup>-1</sup><br>at 1 A g <sup>-1</sup>     | 139 mAh g <sup>-1</sup> (77.3%)<br>at 20 A g <sup>-1</sup>    | 1         |
| NiCo <sub>2</sub> S <sub>4</sub> nanosheets on graphene                          | 0V~0.5V<br>(vs. Ag/ AgCl)    | 202 mAh g <sup>-1</sup><br>at 3 A g <sup>-1</sup>     | 106 mAh g <sup>-1</sup> (52.4%)<br>at 20 A g <sup>-1</sup>    | 2         |
| NiCo <sub>2</sub> S <sub>4</sub> porous nanotubes                                | -0.1V~0.5V<br>(vs. Hg/HgO)   | 152 mAh g <sup>-1</sup><br>at 0.2 A g <sup>-1</sup>   | 76 mAh g <sup>-1</sup> (50.3%)<br>at 5 A g <sup>-1</sup>      | 3         |
| NiCo <sub>2</sub> S <sub>4</sub> nanotube arrays                                 | 0V~0.55V<br>(vs. Hg/HgO)     | 366 mAh g <sup>-1</sup><br>at 5 mA cm <sup>-2</sup>   | 248 mAh g <sup>-1</sup> (67.7%)<br>at 150 mA cm <sup>-2</sup> | 4         |
| Ni-Co-S nanosheet arrays                                                         | -0.2V~0.6V<br>(vs. Ag/ AgCl) | 197 mAh g <sup>-1</sup><br>at 5 A g <sup>-1</sup>     | 178 mAh g <sup>-1</sup> (90.6%)<br>at 100 A g <sup>-1</sup>   | 5         |
| CoNi <sub>2</sub> S <sub>4</sub> /graphene nanocomposite                         | 0V~0.38V<br>(vs. SCE)        | 212 mAh g <sup>-1</sup><br>at 1 A g <sup>-1</sup>     | 110 mAh g <sup>-1</sup> (52.1%)<br>at 20 A g <sup>-1</sup>    | 6         |
| CoNi <sub>2</sub> S <sub>4</sub> nanosheet arrays                                | 0V~0.45V<br>(vs. SCE)        | 363 mAh g <sup>-1</sup><br>at 5 mA cm <sup>-2</sup>   | 284 mAh g <sup>-1</sup> (78.1%)<br>at 50 mA cm <sup>-2</sup>  | 7         |
| Ni-Co sulfide nanowires                                                          | 0V~0.45V<br>(vs. Ag/ AgCl)   | 302 mAh g <sup>-1</sup><br>at 2.5 mA cm <sup>-2</sup> | 147 mAh g <sup>-1</sup> (48.7%)<br>at 30 mA cm <sup>-2</sup>  | 8         |
| Ni <sub>x</sub> Co <sub>3-x</sub> S <sub>4</sub> hollow nanoprisms               | 0V~0.5V<br>(vs. SCE)         | 124 mAh g <sup>-1</sup><br>at 1 A g <sup>-1</sup>     | 81 mAh g <sup>-1</sup> (65.4%)<br>at 20 A g <sup>-1</sup>     | 9         |
| core-shell NiCo <sub>2</sub> S <sub>4</sub> nanostructures                       | 0V~0.5V<br>(vs. Hg/HgO)      | 271 mAh g <sup>-1</sup><br>at 1 mA cm <sup>-2</sup>   | 215 mAh g <sup>-1</sup> (79.4%)<br>at 20 mA cm <sup>-2</sup>  | 10        |
| carbon@NiCo <sub>2</sub> S <sub>4</sub> nanorods                                 | 0V~0.45V<br>(vs. Ag/ AgCl)   | 182 mAh g <sup>-1</sup><br>at 1 A g <sup>-1</sup>     | 158 mAh g <sup>-1</sup> (86.7%)<br>at 10 A g <sup>-1</sup>    | 11        |
| Ni-Co-S ball-in-ball hollow spheres                                              | -0.1V~0.55V<br>(vs. SCE)     | 158 mAh g <sup>-1</sup><br>at 1 A g <sup>-1</sup>     | 108 mAh g <sup>-1</sup> (68.1%)<br>at 20 A g <sup>-1</sup>    | 12        |
| carbon-NiCo <sub>2</sub> S <sub>4</sub> nanosheet arrays                         | -0.2V~0.8V<br>(vs. SCE)      | 368 mAh g <sup>-1</sup><br>at 2 mA cm <sup>-2</sup>   | 146 mAh g <sup>-1</sup> (39.6%)<br>at 200 mA cm <sup>-2</sup> | 13        |
| NiCo <sub>2</sub> S <sub>4</sub> mesoporous nanosheets                           | 0V~0.5V<br>(vs. Hg/HgO)      | 103 mAh g <sup>-1</sup><br>at 1 A g <sup>-1</sup>     | 86 mAh g <sup>-1</sup> (83.3%)<br>at 20 A g <sup>-1</sup>     | 14        |
| NiCo <sub>2</sub> S <sub>4</sub> nanoparticles on graphene                       | -0.2V~0.4V<br>(vs. Ag/ AgCl) | 190 mAh g <sup>-1</sup><br>at 1 A g <sup>-1</sup>     | 129 mAh g <sup>-1</sup> (67.9%)<br>at 40 A g <sup>-1</sup>    | 15        |
| NiCo <sub>2</sub> S <sub>4</sub> flaky arrays                                    | -0.1V~0.5V<br>(vs. SCE)      | 284 mAh g <sup>-1</sup><br>at 1 A g <sup>-1</sup>     | 145 mAh g <sup>-1</sup> (51.1%)<br>at 8 A g <sup>-1</sup>     | 16        |
| NiCo <sub>2</sub> S <sub>4</sub> /Ni(OH) <sub>2</sub> core-shell nanotube arrays | -0.2V~0.6V<br>(vs. Hg/HgO)   | 338 mAh g <sup>-1</sup><br>at 1 mA cm <sup>-2</sup>   | 200 mAh g <sup>-1</sup> (59.3%)<br>at 20 mA cm <sup>-2</sup>  | 17        |
| hollow Ni <sub>x</sub> Co <sub>9-x</sub> S <sub>8</sub> urchins@N-doped carbon   | 0V~0.45V<br>(vs. Ag/ AgCl)   | 176 mAh g <sup>-1</sup><br>at 2 A g <sup>-1</sup>     | 73 mAh g <sup>-1</sup> (41.3%)<br>at 8 A g <sup>-1</sup>      | 18        |

Table S2. Energy densities and power densities for nickel cobalt sulfide-based ASCs in recent reports.

| Positive electrode                                                 | Negative electrode          | Highest potential | Maximum energy density                                   | Maximum power density                                    | Ref.      |
|--------------------------------------------------------------------|-----------------------------|-------------------|----------------------------------------------------------|----------------------------------------------------------|-----------|
| CNTs@Ni-Co-S core/shell arrays                                     | CNTs                        | 1.6 V             | 49.2 Wh kg <sup>-1</sup> (at 800 W kg <sup>-1</sup> )    | 40 kW kg <sup>-1</sup> (at 18.9 Wh kg <sup>-1</sup> )    | this work |
| NiCo <sub>2</sub> S <sub>4</sub> nanotube arrays                   | reduced graphene oxide(RGO) | 1.6 V             | 31.5 Wh kg <sup>-1</sup> (at 156.6 W kg <sup>-1</sup> )  | 2348.5 W kg <sup>-1</sup> (at 16.6 Wh kg <sup>-1</sup> ) | 4         |
| Ni-Co-S nanosheet arrays                                           | porous graphene film        | 1.8 V             | 60 Wh kg <sup>-1</sup> (at 1.8 kW kg <sup>-1</sup> )     | 28.8 kW kg <sup>-1</sup> (at 33 Wh kg <sup>-1</sup> )    | 5         |
| CoNi <sub>2</sub> S <sub>4</sub> nanosheet arrays                  | active carbon (AC)          | 1.7 V             | 33.9 Wh kg <sup>-1</sup> (at 409 W kg <sup>-1</sup> )    | 2458 W kg <sup>-1</sup> (at 27.2 Wh kg <sup>-1</sup> )   | 7         |
| Ni-Co sulfide nanowires                                            | AC                          | 1.8 V             | 25 Wh kg <sup>-1</sup> (at 447 W kg <sup>-1</sup> )      | 3.57 kW kg <sup>-1</sup> (at 17.8 Wh kg <sup>-1</sup> )  | 8         |
| porous Ni-Co sulphides                                             | RGO                         | 1.6 V             | 37.6 Wh kg <sup>-1</sup> (at 775 W kg <sup>-1</sup> )    | 23.25 kW kg <sup>-1</sup> (at 17.7 Wh kg <sup>-1</sup> ) | 19        |
| core-shell NiCo <sub>2</sub> S <sub>4</sub> nanostructures         | porous carbon               | 1.6 V             | 22.8 Wh kg <sup>-1</sup> (at 160 W kg <sup>-1</sup> )    | 2.47 kW kg <sup>-1</sup> (at 10.6 Wh kg <sup>-1</sup> )  | 10        |
| 2D porous Ni-Co Sulfide                                            | AC                          | 1.8 V             | 41.4 Wh kg <sup>-1</sup> (at 414 W kg <sup>-1</sup> )    | 4.8 kW kg <sup>-1</sup> (at 23.8 Wh kg <sup>-1</sup> )   | 20        |
| NiCo <sub>2</sub> S <sub>4</sub> nanosheets                        | FeOOH nanorods              | 1.6 V             | 45.9 Wh kg <sup>-1</sup> (at 1.7 kW kg <sup>-1</sup> )   | 8.6 kW kg <sup>-1</sup> (at 19.9 Wh kg <sup>-1</sup> )   | 21        |
| Ni-Co-S ball-in-ball hollow spheres                                | graphene/carbon spheres     | 1.6 V             | 42.3 Wh kg <sup>-1</sup> (at 476 W kg <sup>-1</sup> )    | 10.2 kW kg <sup>-1</sup> (at 22.9 Wh kg <sup>-1</sup> )  | 12        |
| carbon-NiCo <sub>2</sub> S <sub>4</sub> nanosheet arrays           | AC                          | 1.8 V             | 68.82 Wh kg <sup>-1</sup> (at 47.83 W kg <sup>-1</sup> ) | 1.4 kW kg <sup>-1</sup> (at 26.74 Wh kg <sup>-1</sup> )  | 13        |
| NiCo <sub>2</sub> S <sub>4</sub> mesoporous nanosheets             | AC                          | 1.6 V             | 25.5 Wh kg <sup>-1</sup> (at 334 W kg <sup>-1</sup> )    | 8 kW kg <sup>-1</sup> (at 10.8 Wh kg <sup>-1</sup> )     | 14        |
| 3D cauliflower-like NiCo <sub>2</sub> S <sub>4</sub> architectures | AC                          | 1.6 V             | 44.8 Wh kg <sup>-1</sup> (at 401 W kg <sup>-1</sup> )    | 16 kW kg <sup>-1</sup> (at 23.1 Wh kg <sup>-1</sup> )    | 22        |
| graphene@NiCo <sub>2</sub> S <sub>4</sub> nanoparticles            | AC                          | 1.7 V             | 68.5 Wh kg <sup>-1</sup> (at 850 W kg <sup>-1</sup> )    | 17 kW kg <sup>-1</sup> (at 37.7 Wh kg <sup>-1</sup> )    | 15        |
| mesoporous NiCo <sub>2</sub> S <sub>4</sub> nanoparticles          | AC                          | 1.5 V             | 28.3 Wh kg <sup>-1</sup> (at 245 W kg <sup>-1</sup> )    | 9.8 kW kg <sup>-1</sup> (at 6.8 Wh kg <sup>-1</sup> )    | 23        |

Table S3. Energy densities comparison calculated via two different methods

| Current density<br>(A g <sup>-1</sup> )                    | 1    | 2    | 4    | 8    | 10   | 15   | 20   | 30   | 40   | 50   |
|------------------------------------------------------------|------|------|------|------|------|------|------|------|------|------|
| $E = I \int_{t=0}^{t=t} V(t) dt$<br>(Wh kg <sup>-1</sup> ) | 46.5 | 42.1 | 38.9 | 35.3 | 34.2 | 29.8 | 26.4 | 21.1 | 17.4 | 15.9 |
| $E=0.5C_s\Delta V^2/3.6$<br>(Wh kg <sup>-1</sup> )         | 49.2 | 45.6 | 41.9 | 37.9 | 34.4 | 31.0 | 28.9 | 22.0 | 19.6 | 18.9 |

## References

1. H. Chen, J. Jiang, L. Zhang, H. Wan, T. Qi and D. Xia, *Nanoscale*, 2013, 5, 8879-8883.
2. S. Peng, L. Li, C. Li, H. Tan, R. Cai, H. Yu, S. Mhaisalkar, M. Srinivasan, S. Ramakrishna and Q. Yan, *Chem. Commun.*, 2013, 49, 10178-10180.
3. H. Z. Wan, J. J. Jiang, J. W. Yu, K. Xu, L. Miao, L. Zhang, H. C. Chen and Y. J. Ruan, *Crystengcomm*, 2013, 15, 7649-7651.
4. H. Chen, J. Jiang, L. Zhang, D. Xia, Y. Zhao, D. Guo, T. Qi and H. Wan, *J. Power Sources* 2014, 254, 249-257.
5. W. Chen, C. Xia and H. N. Alshareef, *Acs Nano*, 2014, 8, 9531-9541.
6. W. Du, Z. Wang, Z. Zhu, S. Hu, X. Zhu, Y. Shi, H. Pang and X. Qian, *Journal of Materials Chemistry A*, 2014, 2, 9613.
7. W. Hu, R. Chen, W. Xie, L. Zou, N. Qin and D. Bao, *ACS Appl. Mat. Interfaces* 2014, 6, 19318-19326.
8. Y. Li, L. Cao, L. Qiao, M. Zhou, Y. Yang, P. Xiao and Y. Zhang, *Journal of Materials Chemistry A*, 2014, 2, 6540.
9. L. Yu, L. Zhang, H. B. Wu and X. W. Lou, *Angewandte Chemie-International Edition*, 2014, 53, 3711-3714.
10. W. Kong, C. C. Lu, W. Zhang, J. Pub and Z. H. Wang, *Journal of Materials Chemistry A*, 2015, 3, 12452-12460.
11. L. Li, Z. Dai, Y. Zhang, J. Yang, W. Huang and X. Dong, *RSC Advances*, 2015, 5, 83408-83414.
12. L. Shen, L. Yu, H. B. Wu, X.-Y. Yu, X. Zhang and X. W. Lou, *Nature Communications*, 2015, 6.
13. H. Wang, C. Wang, C. Qing, D. Sun, B. Wang, G. Qu, M. Sun and Y. Tang, *Electrochim. Acta* 2015, 174, 1104-1112.
14. Z. Wu, X. Pu, X. Ji, Y. Zhu, M. Jing, Q. Chen and F. Jiao, *Electrochim. Acta* 2015, 174, 238-245.
15. Y. Xiao, D. Su, X. Wang, L. Zhou, S. Wu, F. Li and S. Fang, *Electrochim. Acta* 2015, 176, 44-50.
16. Z. H. Yang, X. Zhu, K. Wang, G. Ma, H. Cheng and F. F. Xu, *Appl. Surf. Sci.*,

- 2015, 347, 690-695.
17. J. Zhang, H. Gao, M. Y. Zhang, Q. Yang and H. X. Chuo, *Appl. Surf. Sci.* , 2015, 349, 870-875.
  18. Y. Zhang, C. Sun, H. Su, W. Huang and X. Dong, *Nanoscale*, 2015, 7, 3155-3163.
  19. H. Chen, J. Jiang, Y. Zhao, L. Zhang, D. Guo and D. Xia, *Journal of Materials Chemistry A*, 2015, 3, 428-437.
  20. X. Li, Q. Li, Y. Wu, M. Rui and H. Zeng, *ACS Appl. Mat. Interfaces* 2015, 7, 19316-19323.
  21. Y. Li, M. Zhou, X. Cui, Y. Yang, P. Xiao, L. Cao and Y. Zhang, *Electrochim. Acta* 2015, 161, 137-143.
  22. Y. Xiao, Y. Lei, B. Zheng, L. Gu, Y. Wang and D. Xiao, *Rsc Advances*, 2015, 5, 21604-21613.
  23. Y. Zhu, Z. Wu, M. Jing, X. Yang, W. Song and X. Ji, *J. Power Sources* 2015, 273, 584-590.
